# Supplementary material for: Structural basis for allosteric regulation of Human Topoisomerase IIα
Source: PubMed Central journal article supplement (PMC8137924; doi:10.1038/s41467-021-23136-6), 2021-05-20
Supplement: 41467_2021_23136_MOESM3_ESM.pdf [file 41467_2021_23136_MOESM3_ESM.pdf]

### **Description of Additional Supplementary Files**

File Name: Supplementary Movie 1

Description: Cryo-EM structure of the entire human Topo II  $\alpha$  in closed state.

File Name: Supplementary Movie 2

Description: Conformational changes of the human Topo II  $\alpha$  from closed to pre-open state.
